# Supplementary material for: Isolation, Identification, biocontrol activity and plant growth promoting of a superior strain Streptomyces tricolor strain HM10
Source: Research Square preprint supplement (doi:10.21203/rs.3.rs-277273/v1), 2021-04-15
Supplement: Supplementary file 1 [file a4f32ce085a5cd0e3c55b621.docx]

**Isolation, Identification, biocontrol activity and plant growth promoting of a superior strain *Streptomyces tricolor* strain HM10**

**Sources of isolated**:

| **Symbol of isolates** | **Source** |
| --- | --- |
| Actino1 | Soil sample (5) 20/3/2016 |
| Actino2 | Soil sample (5) 20/3/2016 |
| Actino MS 9 | Clover soil Al foaylik center (by student sulaiman Al-Harbi) |
| Actino4 | Soil sample (5) 20/3/2016 |
| Actino5 | Soil sample (5) 20/3/2016 |
| Actino7 | Soil sample (4) 20/3/2016 |
| Actino8 | Soil sample (4) 20/3/2016 |
| Actino9 | Soil sample (4) 20/3/2016 |
| Actino10 | Soil sample (4) 20/3/2016 |
| Actino11 | Soil sample (3) 20/3/2016 |
| Actino12 | Soil sample (3) 20/3/2016 |
